# Supplementary material for: Definitions of poor outcome after total knee arthroplasty: an inventory review
Source: Springer Nature journal article supplement (doi:10.1186/s12891-020-03406-y), 2020-06-13
Supplement: MOESM1 [file 18080190]

## Supplementary file 1: Example search terms – for PubMed

### PUBMED SRs:

((((((("Arthroplasty, Knee"[Mesh] OR total knee arthroplasty [title] ))) AND ("Outcome Assessment (Health Care)"[Mesh] OR Outcome [tiab] OR result [tiab] OR "Patient Reported Outcome Measures"[Mesh] OR patient reported [tiab] OR outcome score [tiab] OR PROM [tiab] OR clinical [tiab] OR function\* [tiab] OR "Patient Satisfaction"[Mesh] OR satisfaction [tiab] OR "Prosthesis Failure"[Mesh] OR failure [tiab] OR "Pain"[Mesh] OR pain [tiab] OR "Postoperative Complications"[Mesh] OR complication\* [tiab] OR "Postoperative Period"[Mesh] OR post-operative [tiab] OR "Long Term Adverse Effects"[Mesh] OR long-term [tiab]))) AND systematic [sb])

Filter used: Text availability: Full text

### PUBMED articles after 2016:

((((((("Arthroplasty, Knee"[Mesh] OR total knee arthroplasty [title] ))) AND ("Outcome Assessment (Health Care)"[Mesh] OR Outcome [tiab] OR result [tiab] OR "Patient Reported Outcome Measures"[Mesh] OR patient reported [tiab] OR outcome score [tiab] OR PROM [tiab] OR clinical [tiab] OR function\* [tiab] OR "Patient Satisfaction"[Mesh] OR satisfaction [tiab] OR "Prosthesis Failure"[Mesh] OR failure [tiab] OR "Pain"[Mesh] OR pain [tiab] OR "Postoperative Complications"[Mesh] OR complication\* [tiab] OR "Postoperative Period"[Mesh] OR post-operative [tiab] OR "Long Term Adverse Effects"[Mesh] OR long-term [tiab])))

Filters used: Publication dates (From 2016/01/01 to 2019/05/14); Text availability: Full text
